# Supplementary material
Source: PubMed Central journal article supplement (PMC5526631)
Supplement: NIHMS870784-supplement-eFigure__eTable1__and_eTable2.pdf [file NIHMS870784-supplement-eFigure__eTable1__and_eTable2.pdf]

## Supplementary Online Content

Khan A, Coffey M, Litterer KP, et al. Families as partners in hospital error and adverse event surveillance. *JAMA Pediatr*. Published online February 27, 2017.  
doi:10.1001/jamapediatrics.2016.4812.

**eFigure.** Cohort diagram

**eTable 1.** Unadjusted rates of family-reported errors/AEs by patient and parent/caregiver characteristics<sup>a</sup>

**eTable 2.** Adjusted predictors of family-reported errors/AEs

This supplementary material has been provided by the authors to give readers additional information about their work.

**eFigure.** Cohort diagram

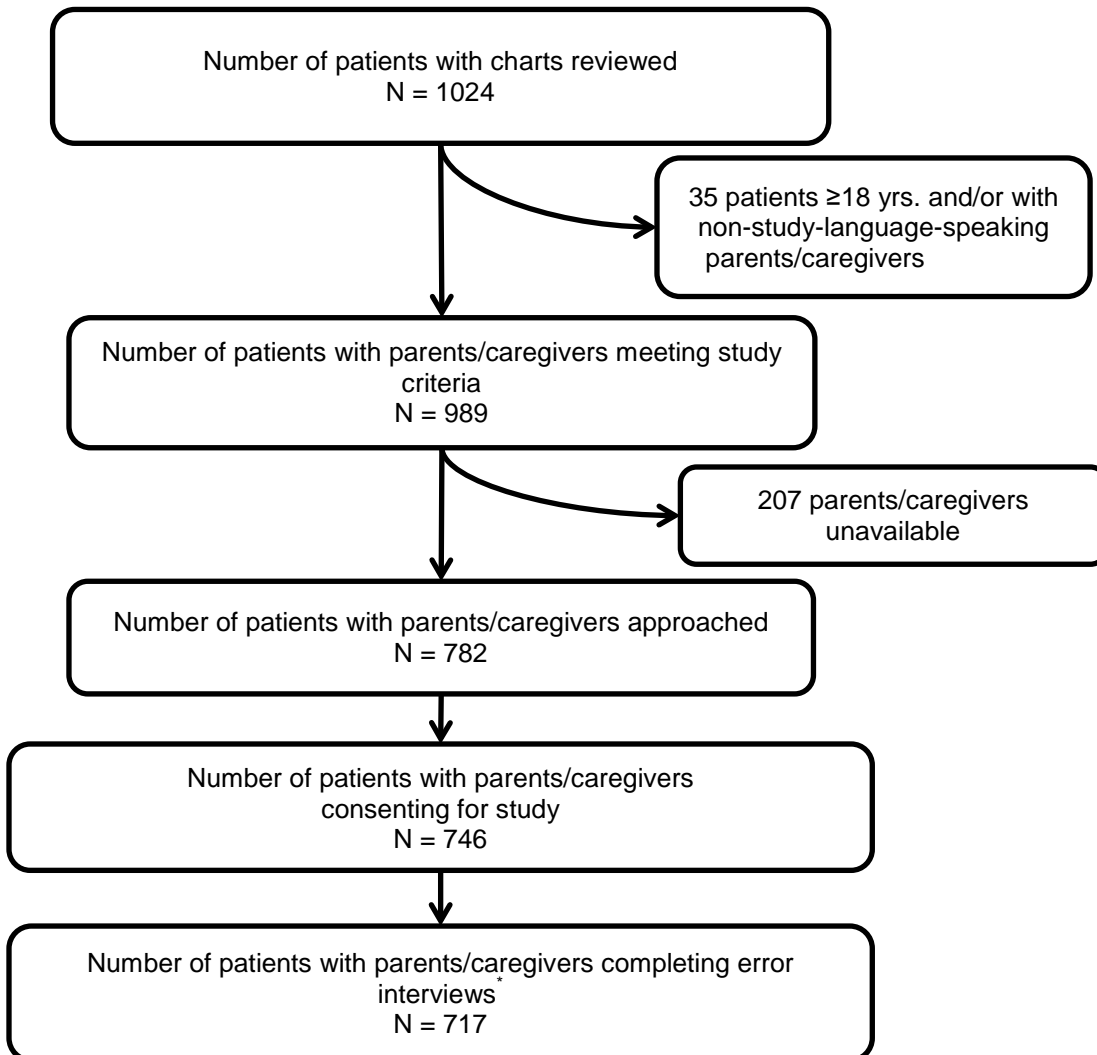

\*These culminated in a total of 763 interviews (parents/caregivers could complete more than one interview).

**eTable 1.** Unadjusted rates of family-reported errors/AEs by patient and parent/caregiver characteristics<sup>a</sup>

| Patient Characteristics          | Rates of Total Family-Reported Incidents (per 1000 patient-days) |            |                    |            |
|----------------------------------|------------------------------------------------------------------|------------|--------------------|------------|
|                                  | Errors                                                           |            | AEs                |            |
|                                  | Error Rates (95% CI)                                             | P value    | AE Rates (95% CI)  | P value    |
| Age, y                           |                                                                  |            |                    |            |
| <1                               | 10.2 (5.0, 21.1)                                                 | <b>.02</b> | 7.8 (3.3, 18.3)    | .58        |
| 1-5                              | 19.4 (11.5, 32.6)                                                |            | 12.0 (6.4, 22.7)   |            |
| 6-13                             | 4.9 (1.9, 13.0)                                                  |            | 11.9 (6.2, 22.8)   |            |
| 14-17                            | 20.3 (10.8, 37.9)                                                |            | 16.0 (8.8, 29.0)   |            |
| Sex                              |                                                                  |            |                    |            |
| Female                           | 12.8 (7.9, 20.8)                                                 | .88        | 10.8 (6.7, 17.6)   | .89        |
| Male                             | 13.5 (8.3, 22.0)                                                 |            | 11.4 (6.8, 19.1)   |            |
| CCC <sup>b</sup> Count           |                                                                  |            |                    |            |
| 0                                | 9.0 (5.6, 14.4)                                                  | <b>.03</b> | 8.0 (4.9, 13.1)    | <b>.05</b> |
| ≥1                               | 21.3 (13.1, 34.5)                                                |            | 17.3 (10.7, 28.1)  |            |
| Insurance                        |                                                                  |            |                    |            |
| Public                           | 10.8 (6.6, 17.7)                                                 | .17        | 10.3 (6.5, 16.5)   | .56        |
| Non-public                       | 17.9 (11.1, 28.7)                                                |            | 12.8 (7.6, 21.5)   |            |
| Parent/Caregiver Characteristics |                                                                  |            |                    |            |
| Age, y                           |                                                                  |            |                    |            |
| ≤25                              | 10.4 (4.8, 22.6)                                                 | .48        | 10.4 (4.8, 22.6)   | .15        |
| 26-32                            | 13.6 (7.1, 26.0)                                                 |            | 11.0 (5.3, 22.8)   |            |
| 33-39                            | 9.9 (4.7, 20.9)                                                  |            | 5.9 (2.6, 13.5)    |            |
| ≥40                              | 19.8 (11.3, 34.6)                                                |            | 18.5 (10.9, 31.7)  |            |
| Sex                              |                                                                  |            |                    |            |
| Female                           | 11.9 (7.9, 18.0)                                                 | .21        | 10.7 (7.0, 16.1)   | .56        |
| Male                             | 20.1 (11.2, 36.2)                                                |            | 13.8 (6.8, 27.7)   |            |
| Race/Ethnicity                   |                                                                  |            |                    |            |
| Nonwhite                         | 10.8 (6.2, 18.9)                                                 | .29        | 10.8 (6.6, 17.8)   | .90        |
| White                            | 15.8 (10.2, 24.3)                                                |            | 11.4 (6.8, 19.1)   |            |
| Relationship to Patient          |                                                                  |            |                    |            |
| Parent                           | 13.1 (9.1, 19.0)                                                 | .35        | 11.2 (7.6, 16.4)   | .16        |
| Grandparent                      | 29.4 (10.2, 84.7)                                                |            | 5.9 (5.9, 5.9)     |            |
| Guardian                         | 17.9 (17.9, 17.9)                                                |            | 53.6 (19.4, 148.0) |            |
| Other                            | 12.0 (5.5, 26.1)                                                 |            | 12.0 (5.5, 26.1)   |            |

|                                                                         |                             |                 |                          |                |
|-------------------------------------------------------------------------|-----------------------------|-----------------|--------------------------|----------------|
| Primary Language                                                        |                             |                 |                          |                |
| English                                                                 | 13.3 (9.2, 19.1)            | .76             | 11.4 (7.8, 16.6)         | .98            |
| Other                                                                   | 11.2 (3.7, 34.1)            |                 | 11.2 (3.7, 34.1)         |                |
| <b>Rates of Total Family-Reported Incidents (per 1000 patient-days)</b> |                             |                 |                          |                |
|                                                                         | <b>Errors</b>               |                 | <b>AEs</b>               |                |
| <b>Parent/Caregiver Characteristics</b>                                 | <b>Error Rates (95% CI)</b> | <b>P value</b>  | <b>AE Rates (95% CI)</b> | <b>P value</b> |
| Proficiency in Spoken English                                           |                             |                 |                          |                |
| Proficient                                                              | 13.8 (9.7, 19.5)            | <b>&lt;.001</b> | 11.2 (7.7, 16.3)         | .87            |
| Not proficient                                                          | 3.4 (3.4, 3.4)              |                 | 10.1 (2.7, 37.2)         |                |
| Proficiency at Reading English                                          |                             |                 |                          |                |
| Proficient                                                              | 15.6 (11.0, 22.2)           | <b>&lt;.001</b> | 12.2 (8.3, 17.9)         | .20            |
| Not proficient                                                          | 2.9 (0.8, 10.8)             |                 | 6.8 (2.6, 17.9)          |                |
| Income, \$                                                              |                             |                 |                          |                |
| <30,000                                                                 | 10.4 (4.5, 24.5)            | .42             | 16.9 (8.4, 33.8)         | .11            |
| 30,000-49,999                                                           | 17.8 (6.2, 50.7)            |                 | 17.8 (7.6, 41.4)         |                |
| 50,000-74,999                                                           | 12.5 (4.8, 32.9)            |                 | 5.4 (1.5, 19.7)          |                |
| 75,000-99,999                                                           | 40.5 (16.5, 99.6)           |                 | 49.5 (22.1, 110.9)       |                |
| ≥100,000                                                                | 20.8 (10.7, 40.4)           |                 | 11.0 (5.3, 23.2)         |                |
| Education                                                               |                             |                 |                          |                |
| Less than high school                                                   | 4.4 (4.4, 4.4)              | <b>.005</b>     | 4.4 (4.4, 4.4)           | <b>.01</b>     |
| Some or all of high school                                              | 9.8 (4.2, 23.0)             |                 | 8.8 (4.0, 19.5)          |                |
| Some college or more                                                    | 16.1 (11.3, 23.1)           |                 | 13.3 (9.0, 19.7)         |                |
| Time spent in hospital                                                  |                             |                 |                          |                |
| Rarely to often                                                         | 12.1 (5.0, 29.5)            | .39             | 7.2 (2.7, 19.8)          | <b>.04</b>     |
| Almost always                                                           | 18.0 (11.4, 28.3)           |                 | 17.1 (11.3, 25.8)        |                |
| Time spent in hospital in last 24 hours, h                              |                             |                 |                          |                |
| <24                                                                     | 17.2 (8.3, 35.7)            | .99             | 13.4 (5.8, 30.8)         | .68            |
| 24                                                                      | 17.1 (10.5, 27.9)           |                 | 16.2 (10.5, 25.1)        |                |

<sup>a</sup>Values refer to patients (n=717) with completed Family Safety Interviews.

<sup>b</sup>CCC=complex chronic condition; the CCC system uses ICD-9-CM codes to capture medically complex children, namely those with medical conditions expected to last ≥12 months that involve several different organ systems or one organ system severely enough to require specialty pediatric care and hospitalization in a tertiary care center.<sup>28</sup>

**eTable 2.** Adjusted predictors of family-reported errors/AEs

|                                  | Total Family-Reported Incidents |                 |                |                 |
|----------------------------------|---------------------------------|-----------------|----------------|-----------------|
|                                  | Errors                          |                 | AEs            |                 |
| Patient Characteristics          | RR (95% CI)                     | <i>P</i> value  | RR (95% CI)    | <i>P</i> value  |
| Age, y                           | 0.9 (0.9, 1.0)                  | <b>.04</b>      | 1.0 (0.9, 1.1) | .91             |
| CCC <sup>a</sup> Count           |                                 |                 |                |                 |
| ≥1                               | 2.4 (1.2, 4.8)                  | <b>.01</b>      | 2.3 (1.1, 4.8) | <b>.02</b>      |
| 0                                | 1                               |                 | 1              |                 |
| Parent/Caregiver Characteristics |                                 |                 |                |                 |
| Age, y                           | 1.0 (1.0, 1.1)                  | <b>.03</b>      | 1.0 (1.0, 1.0) | .72             |
| Education                        |                                 |                 |                |                 |
| Less than high school            | 0.2 (0.1, 0.3)                  | <b>&lt;.001</b> | 0.3 (0.2, 0.4) | <b>&lt;.001</b> |
| Some or all of high school       | 0.7 (0.3, 1.9)                  | .49             | 0.8 (0.3, 1.9) | .58             |
| Some college or more             | 1                               |                 | 1              |                 |

<sup>a</sup>CCC=complex chronic condition; the CCC system uses ICD-9-CM codes to capture medically complex children, namely those with medical conditions expected to last ≥12 months that involve several different organ systems or one organ system severely enough to require specialty pediatric care and hospitalization in a tertiary care center.<sup>28</sup>
